# Supplementary material
Source: publisher figshare collection journal article supplement (https://frontiersin.figshare.com/ndownloader/files/24461282)
Supplement: Supplementary file [file 24461282]

**Constructs C1-C5:**

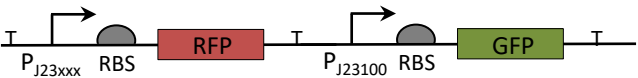

**Constructs C6-C10:**

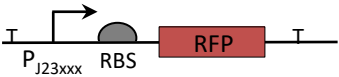

**Construct C11:**

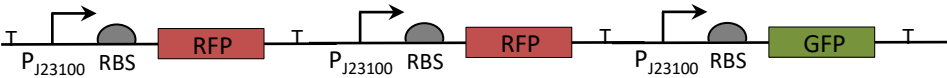

**Construct C12:**

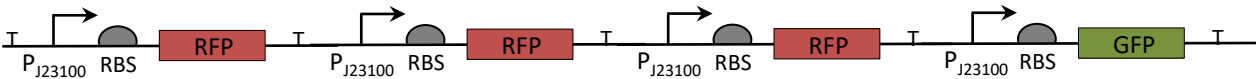

**Construct C13:**

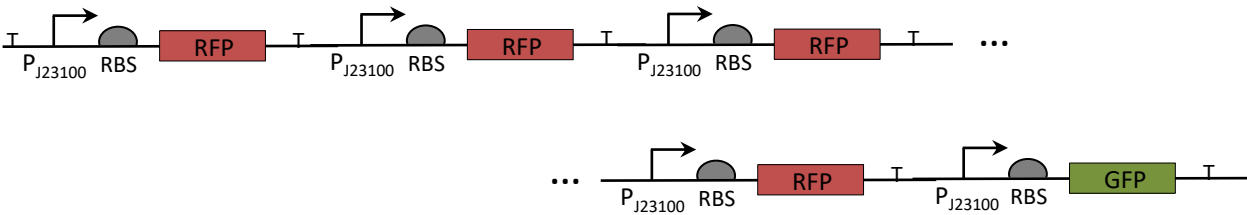

**Construct C14:**

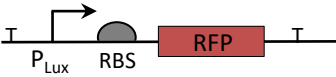

**Construct C15:**

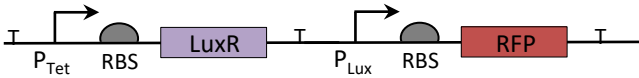

**Construct C16:**

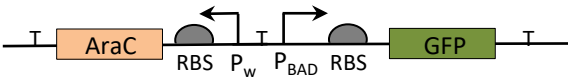

**Construct C17:**

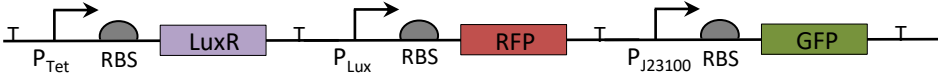

**Construct C18:**

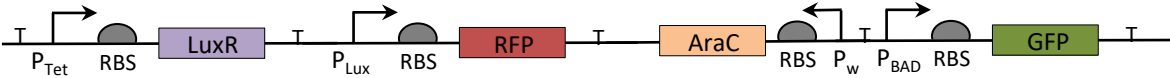

**Construct C19:**

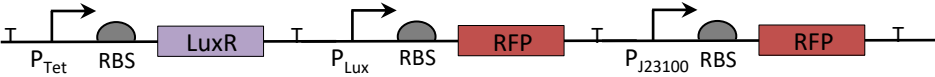

**Fig. S1. Schematic representation of the genetic constructs analysed in this study.**

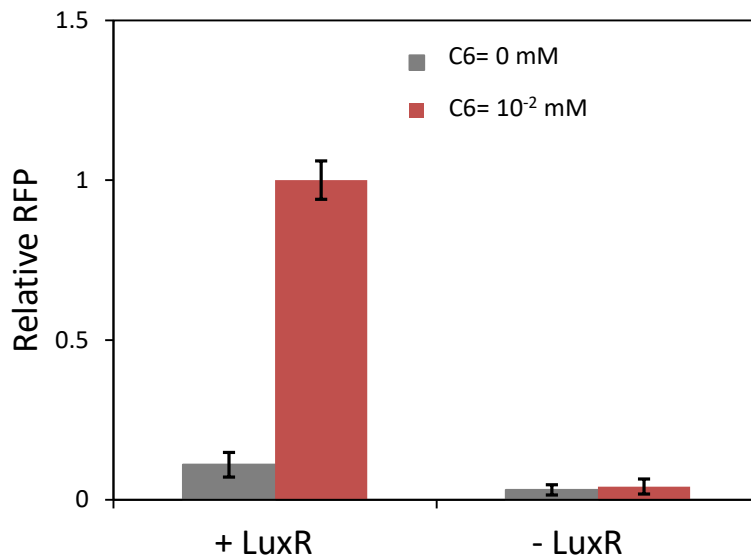

**Fig. S2. Relative RFP levels in the different transcriptional modes in the LuxR system.** RFP levels in the presence (+ LuxR) or absence (- LuxR) of LuxR, in the presence (grey bars) or absence (red bars) of 10<sup>-2</sup> mM C6. Error bars are the standard deviation from three independent experiments. RFP levels are shown relative to those in + LuxR,+C6.

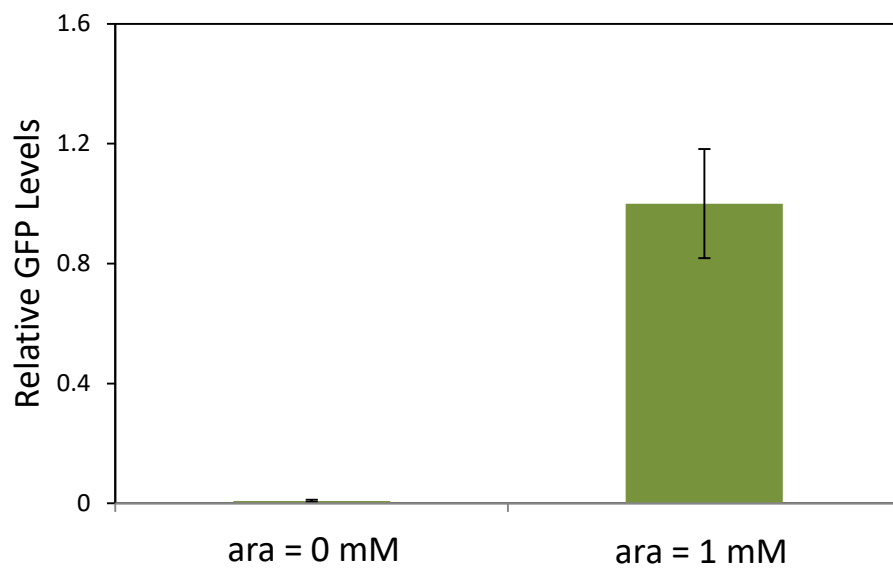

**Fig. S3. Relative GFP levels in the arabinose-inducible system.** Relative GFP levels in the presence or absence of arabinose (ara).
